# Supplementary material for: Head and neck cancers survival in Europe, Taiwan, and Japan: results from RARECAREnet Asia based on a privacy-preserving federated infrastructure
Source: PubMed Central journal article supplement (PMC10534949; doi:10.3389/fonc.2023.1219111), 2023-09-13
Supplement: DataSheet_1.pdf [file DataSheet_1.pdf]

## **APPENDIX**

### **Table of Contents:**

- Page 2,3: Appendix Table A “Definition of head and neck sites and histologies included in the study, based on the topography and morphology code of the International Classification for Disease for Oncology (ICD-O), Third Revision. Definition of subsites for cancer of the oral cavity, hypopharynx, larynx, nasal cavity, salivary gland cancer, and definition of histological subtype groups for oropharyngeal and nasopharyngeal cancers.”
- Page 4: Appendix Table B “Data quality indicators for all cancers and for malignant epithelial head and neck cancer patients by geographical area.”
- Page 5: Appendix Table C “Distribution of squamous cancers occurring in major salivary gland tumours and in subsites by geographical area.”
- Page 6: Appendix Table D “RARECAREnet WG.”

**Table A: Definition of head and neck sites and histologies included in the study, based on the topography and morphology code of the International Classification for Disease for Oncology (ICD-O), Third Revision. Definition of subsites for cancer of the oral cavity, hypopharynx, larynx, nasal cavity, salivary gland cancer, and definition of histological subtype groups for oropharyngeal and nasopharyngeal cancers.**

| Site (ICD-O3 code)                                                    | Sub-Site/Histology group                          | ICD-O3 code:<br>sub-site/histology group | ICD-O3 code: Histology                                                                                                                                                                                                                                                                                                                             |
|-----------------------------------------------------------------------|---------------------------------------------------|------------------------------------------|----------------------------------------------------------------------------------------------------------------------------------------------------------------------------------------------------------------------------------------------------------------------------------------------------------------------------------------------------|
| <b>Oral cavity<br/>(C02.0-C02.3, C02.9, C03.0-C05.0, C06.0-C06.9)</b> | Tongue, other parts                               | C02.0–C02.3, C02.9                       | 8000, 8001, 8003-8004, 8010- 8012, 8015, 8020-8022, 8030-8034, 8050-8052, 8070-8078, 8082-8084, 8123, 8560, 8951, 8980, 8981; 8140, 8141, 8143, 8144, 8147, 8190, 8200, 8201,8211, 8230, 8231, 8260, 8261, 8263, 8290, 8310, 8320, 8323, 8401, 8430, 8440, 8450, 8480-8500, 8504, 8510, 8525, 8550, 8551, 8562, 8570, 8574, 8575, 8941, 8982       |
|                                                                       | Gum                                               | C03.0–C03.9                              |                                                                                                                                                                                                                                                                                                                                                    |
|                                                                       | Floor of mouth                                    | C04.0–C04.9                              |                                                                                                                                                                                                                                                                                                                                                    |
|                                                                       | Hard palate                                       | C05.0                                    |                                                                                                                                                                                                                                                                                                                                                    |
|                                                                       | Cheek and vestibule of mouth                      | C06.0–C06.1                              |                                                                                                                                                                                                                                                                                                                                                    |
|                                                                       | Retromolar area                                   | C06.2                                    |                                                                                                                                                                                                                                                                                                                                                    |
|                                                                       | Mouth, NOS                                        | C06.8–C06.9                              |                                                                                                                                                                                                                                                                                                                                                    |
| <b>Hypopharynx<br/>(C12.9, C13)</b>                                   | Pyriiform sinus and posterior wall of hypopharynx | C12.9, C13.2                             | 8000, 8001, 8003-8005, 8010-8012, 8020-8022, 8030-8033, 8035, 8050-8052, 8070-8078, 8082-8084, 8120, 8123, 8560, 8951, 8980; 8140, 8141, 8143, 8144, 8147, 8190, 8200, 8201,8211, 8230, 8231, 8260, 8261, 8263, 8290, 8310, 8320, 8323, 8401, 8430, 8440, 8450, 8480-8500, 8504, 8510, 8525, 8550, 8551, 8562, 8570, 8574, 8575, 8941, 8982        |
|                                                                       | Aryepiglottic fold                                | C13.1                                    |                                                                                                                                                                                                                                                                                                                                                    |
|                                                                       | Postcricoid region                                | C13.0                                    |                                                                                                                                                                                                                                                                                                                                                    |
|                                                                       | Hypopharynx, NOS                                  | C13.8–C13.9                              |                                                                                                                                                                                                                                                                                                                                                    |
| <b>Larynx<br/>(C32)</b>                                               | Glottis                                           | C32.0                                    | 8000, 8001, 8003-8005, 8010-8012, 8020-8022, 8030-8033, 8035, 8050-8052, 8070-8076, 8078, 8082,-8084, 8120, 8123, 8560, 8951, 8980; 8140, 8141, 8143, 8144, 8147, 8190, 8200, 8201,8211, 8230, 8231, 8260, 8261, 8263, 8290, 8310, 8320, 8323, 8401, 8430, 8440, 8450, 8480-8500, 8504, 8510, 8525, 8550, 8551, 8562, 8570, 8574, 8575, 8941, 8982 |
|                                                                       | Supraglottis                                      | C32.1                                    |                                                                                                                                                                                                                                                                                                                                                    |
|                                                                       | Subglottis                                        | C32.2                                    |                                                                                                                                                                                                                                                                                                                                                    |
|                                                                       | Overlapping lesion of larynx                      | C32.8                                    |                                                                                                                                                                                                                                                                                                                                                    |
|                                                                       | Larynx, NOS                                       | C32.9                                    |                                                                                                                                                                                                                                                                                                                                                    |
| <b>Nasal cavity and paranasal sinuses (C30.0, C31)</b>                | Nasal cavity                                      | C30.0                                    | 8000, 8001, 8003, 8004, 8010,-8012, 8020-8023, 8030, 8031-8034, 8046, 8050-8052, 8070-8076, 8078, 8082-8084, 8120-8123, 8130, 8560, 8980, 8140, 8141, 8143, 8144, 8147, 8190, 8200, 8201,8211, 8230, 8231, 8260,                                                                                                                                   |
|                                                                       | Maxillary sinus                                   | C31.0                                    |                                                                                                                                                                                                                                                                                                                                                    |

|                                                                                                    |                                                  |                                  |                                                                                                                                                                                                                                                                                                                                                                                                                                                                                  |
|----------------------------------------------------------------------------------------------------|--------------------------------------------------|----------------------------------|----------------------------------------------------------------------------------------------------------------------------------------------------------------------------------------------------------------------------------------------------------------------------------------------------------------------------------------------------------------------------------------------------------------------------------------------------------------------------------|
|                                                                                                    | Ethmoid                                          | C31.1                            | 8261, 8263, 8290, 8310, 8320, 8323, 8401, 8430, 8440, 8450, 8480-8500, 8504, 8510, 8525, 8550, 8551, 8562, 8570, 8574, 8575, 8941, 8982                                                                                                                                                                                                                                                                                                                                          |
|                                                                                                    | Other accessory sinuses                          | C31.2, C31.3                     |                                                                                                                                                                                                                                                                                                                                                                                                                                                                                  |
|                                                                                                    | Overlapping and NOS                              | C31.8, C31.9                     |                                                                                                                                                                                                                                                                                                                                                                                                                                                                                  |
| <b>Major salivary gland<br/>( C07.9, C08)</b>                                                      | Parotid gland                                    | C07.9                            | 8000, 8001, 8003-8005, 8010-8012, 8014, 8015, 8020,-8022, 8030,8031, 8032, 8033, 8034, 8035, 8046, 8050, 8051, 8052, 8070, 8071, 8072,8073, 8074, 8075, 8076, 8078, 8082, 8083, 8084, 8120-8123, 8130, 8140, 8141, 8143, 8144, 8147, 8190, 8200, 8201, 8211, 8230, 8231, 8255, 8260, 8261, 8262, 8263, 8290, 8310, 8320, 8323, 8401, 8410, 8430, 8440, 8450, 8480-8500, 8502,8504, 8510, 8525, 8550, 8551, 8560, 8561, 8562, 8570, 8574,8575, 8940, 8941, 8951, 8980, 8981, 8982 |
|                                                                                                    | Submandibular gland                              | C08.0                            |                                                                                                                                                                                                                                                                                                                                                                                                                                                                                  |
|                                                                                                    | Sublingual gland                                 | C08.1                            |                                                                                                                                                                                                                                                                                                                                                                                                                                                                                  |
|                                                                                                    | Overlapping lesions and major salivary gland NOS | C08.8,C08.9                      |                                                                                                                                                                                                                                                                                                                                                                                                                                                                                  |
| <b>Oropharynx<br/>( C01.9, C02.4, C09.0, C09.1, C09.9, C05.1, C05.2, C10.2-C10.3, C10.8-C10.9)</b> | TRA                                              | C01.9,C02.4, C09.0, C09.1, C09.9 | 8000, 8001, 8003-8005, 8010-8012, 8020-8022, 8030-8033, 8050-8052, 8070-8076, 8078, 8082-8086, 8120, 8121, 8123, 8560, 8951, 8980, 8140, 8141, 8143, 8144, 8147, 8190, 8200, 8201,8211, 8230, 8231, 8260, 8261, 8263, 8290, 8310, 8320, 8323, 8401, 8430, 8440, 8450, 8480-8500, 8504, 8510, 8525, 8550, 8551, 8562, 8570, 8574, 8575, 8941, 8982                                                                                                                                |
|                                                                                                    | nTRA                                             | C05.1,C05.2,C10.2, C10.3         |                                                                                                                                                                                                                                                                                                                                                                                                                                                                                  |
|                                                                                                    | NOS and overlapping                              | C10.8, C10.9                     |                                                                                                                                                                                                                                                                                                                                                                                                                                                                                  |
| <b>Nasopharynx<br/>(C11)</b>                                                                       | Keratinizing squamous cell                       | 8070, 8071                       | 8000, 8001, 8003, 8005, 8010, 8020,8021, 8082, 8070-8073, 8083*                                                                                                                                                                                                                                                                                                                                                                                                                  |
|                                                                                                    | Nonkeratinizing                                  | 8020,8021, 8082, 8072, 8073      |                                                                                                                                                                                                                                                                                                                                                                                                                                                                                  |
|                                                                                                    | Carcinoma not otherwise specified                | 8010                             |                                                                                                                                                                                                                                                                                                                                                                                                                                                                                  |
|                                                                                                    | Basaloid squamous cell carcinomas*               | 8083*                            |                                                                                                                                                                                                                                                                                                                                                                                                                                                                                  |
|                                                                                                    | Neoplasm NOS                                     | 8000-8005                        |                                                                                                                                                                                                                                                                                                                                                                                                                                                                                  |

\* deleted from the analysis as fewer than 0.2% of all nasopharynx cases in each country

**Table B: Data quality indicators for all cancers and for malignant epithelial head and neck cancer patients by geographical area**

| Cancers                          | Geographical area | Cases     | Quality indicators         |                           |                            |
|----------------------------------|-------------------|-----------|----------------------------|---------------------------|----------------------------|
|                                  |                   |           | DCO % (N/D)                | Autopsy % (N/D)           | % Lost to follow-up* (N/D) |
| All malignant cases              | Japan             | 759,269   | 6.4<br>(48,355/759,269)    | 0.05<br>(410/759,269)     | 0                          |
|                                  | Taiwan            | 277,833   | 1<br>(2,774/277,833)       | 0                         | 0                          |
|                                  | Europe            | 8,332,750 | 3.2<br>(264,936/8,332,750) | 0.4<br>(35,529/8,332,750) | 1.4<br>(57,952/4,100,011)  |
| Epithelial H&N malignant tumours | Japan             | 20,570    | 3.2<br>(654/20,570)        | 0.005<br>(1/20,570)       | 0                          |
|                                  | Taiwan            | 27,151    | 0.4<br>(103/27,151)        | 0                         | 0                          |
|                                  | Europe            | 262,645   | 1.6<br>(4,339/262,645)     | 0.2<br>(440/262,645)      | 1.6<br>(2,212/137,536)     |

\*Lost to follow-up: cases with a potential follow-up of five years that were censored earlier

**Table C: Distribution of squamous cancers occurring in major salivary gland tumours and in subsites by geographical area**

| Site/Subsite                     | Geographical area | % Squamous cancers* (N/D) |
|----------------------------------|-------------------|---------------------------|
| Major salivary gland tumours     | Europe            | 19 (3381/18,254)          |
|                                  | Taiwan            | 5 (13/805)                |
|                                  | Japan             | 8 (301/3,589)             |
| Parotid gland                    | Europe            | 19 (2,558/13,591)         |
|                                  | Taiwan            | 5 (25/554)                |
|                                  | Japan             | 8 (202/2,455)             |
| Submandibular gland              | Europe            | 18 (516/2,797)            |
|                                  | Taiwan            | 7 (12/186)                |
|                                  | Japan             | 10 (96/955)               |
| Sublingual gland                 | Europe            | 29 (89/311)               |
|                                  | Taiwan            | 0 (0/26)                  |
|                                  | Japan             | 2 (2/125)                 |
| Major salivary gland tumours NOS | Europe            | 14 (218/1,555)            |
|                                  | Taiwan            | 15 (6/39)                 |
|                                  | Japan             | 2 (1/54)                  |

\*defined using the malignant morphology codes: ICD-O-3: 8070-8072

## Table D: RARECAREnet Working Group

Monika Hackl (Austrian National Cancer Registry); Elizabeth Van Eycken, Kris Henau (Belgian Cancer Registry); Nadya Dimitrova, Zdravka Valerianova (Bulgaria Cancer Registry); Mario Sekerija (Croatian Cancer Registry); Ladislav Dušek (Czech National Cancer Registry); Margit Mägi (Estonian Cancer Registry); Keiu Paapsi (National Institute for Health Development, Estonia); Nea Malila, Maarit Leinonen (Finnish Cancer Registry); Michel Velten (Bas Rhin Cancer Registry); Anne-Valérie Guizard (Calvados, Registre Général des Tumeurs); Anne-Sophie Woronoff (Doubs Cancer Registry); Michel Robaszekiewicz (Finistère Digestive Tract Registry); Isabelle Baldi (Gironde CNS Tumour Registry); Brigitte Tretarre (Hérault Cancer Registry); Marc Colonna (Isère Cancer Registry); Florence Molinié, Anne Cowppli-Bony (Loire-Atlantique/Vendée Cancer Registry); Simona Bara (Manche Cancer Registry); Bénédicte Lapôtre-Ledoux (Somme Cancer Registry); Laetitia Daubisse-Marliac (Tarn Cancer Registry); Roland Stabenow (Berlin; Brandenburg; Mecklenburg-West Pomerania; Saxony; Saxony-Anhalt; Thüringen Cancer Registry); Sabine Luttmann (Bremen Cancer Registry, Leibniz Institute for Prevention Research and Epidemiology); Alice Nennecke (Hamburg Cancer Registry); Jutta Engel, Gabriele Schubert-Fritschle (Munich Cancer Registry); Jan Heidrich (North Rhine-Westphalia Cancer Registry); Bernd Holleczeck (Saarland Cancer Registry); Jón Gunnlaugur Jónasson, Helgi Birgisson (Icelandic Cancer Registry); Kerri Clough-Gorr, Harry Comber (National Cancer Registry Ireland); Guido Mazzoleni (Alto Adige Cancer Registry); Adriano Giacomini (Biella Cancer Registry); Antonella Sutura Sardo (Catanzaro Cancer Registry); Adele Caldarella, Teresa Intrieri (Tuscany Cancer Registry); Luigino Dal Maso, Martina Taborelli (Friuli Venezia Giulia Cancer Registry, Centro di Riferimento Oncologico di Aviano (CRO) di Aviano, IRCCS); Roberta De Angelis, Silvia Francisci, Corrado Di Benedetto, Sandra Mallone, Daniela Pierannunzio, Andrea Tavilla, Silvia Rossi, Mariano Santaquilani (Istituto Superiore di Sanità, Rome); Fabio Pannozzo (Latina Cancer Registry); Paolo Ricci (Mantova Cancer Registry); Antonio Giampiero Russo, Andreano Anita (Registro Tumori dell'ATS di Milano); Gianbattista Spagnoli (Modena Cancer Registry); Mario Fusco (Napoli 3 South Cancer Registry); Mario Usala (Nuoro Cancer Registry); Francesco Vitale (Palermo Cancer Registry); Maria Michiara (Parma Cancer Registry); Rosario Tumino, Giuseppe Cascone (Ragusa Cancer Registry); Lucia Mangone (Reggio Emilia Cancer Registry); Fabio Falcini (Romagna Cancer Registry, Istituto Scientifico Romagnolo per lo Studio e la Cura dei Tumori (IRST), IRCCS, Meldola, Forlì, Italy-Azienda Usl della Romagna, Forlì, Italy); Rosa Vattiato (Romagna Cancer Registry); Stefano Ferretti (Ferrara Cancer Registry); Rosa Angela Filiberti, Enza Marani (RT Liguria, Ospedale Policlinico San Martino, Genova); Arturo Iannelli, Anna Luisa Caiazzo (Salerno Cancer Registry); Rosaria Cesaraccio (Sassari Cancer Registry); Silvano Piffer, Maria Gentilini (Servizio Epidemiologia Clinica e Valutativa, Trento); Anselmo Madeddu, Antonino Ziino Colanino (Siracusa Cancer Registry); Anna Clara Fanetti (Sondrio Cancer Registry); Pina Candela (Trapani Cancer Registry); Fabrizio Stracci (Umbria Cancer Registry); Giovanna Tagliabue (Varese Province Cancer Registry, Fondazione IRCCS Istituto Nazionale dei Tumori); Massimo Ruggie (Azienda Zero, SER - Registro Tumori del Veneto); Paolo Baili, Laura Botta, Riccardo Capocaccia, Roberto Foschi, Gemma Gatta, Pamela Minicozzi, Annalisa Trama, Carmen Tereanu, Milena Sant (Fondazione IRCCS, National Cancer Institute, Milan); Santa Pildava (Latvian Cancer Registry); Giedre Smailyte (Lithuanian Cancer Registry); Neville Calleja, Dominic Agius (Malta National Cancer Registry, Health Information and Research); Tom Børge Johannesen (Norwegian Cancer Registry); Jadwiga Rachtan (Cracow Cancer Registry); Paweł Macek, Stanisław Gózdź (Kielce Cancer Registry); Jerzy Błaszczyk, Kamila Kępska (Lower Silesia Cancer Registry, Wrocław); Gonçalo Forjaz de Lacerda (Açores Cancer Registry); Maria José Bento (Northern Portugal Cancer Registry); Ana Miranda (Southern Portugal Cancer Registry); Chakameh Safaei Diba (Slovakian National Cancer Registry); Vesna Zadnik, Tina Žagar (Slovenian Cancer Registry); Enrique Almar (Albacete Castilla-La Mancha Cancer Registry); Nerea Larrañaga, Arantza Lopez de Munain (Basque Country Cancer Registry, CIBERESP); José María Díaz García (Cuenca Cancer Registry); Rafael Marcos-Gragera (Girona Cancer Registry); Maria José Sanchez (Granada Cancer Registry, CIBERESP, IBS.Granada); M<sup>a</sup> Dolores Chirlaque, Diego Salmerón (Murcia Cancer Registry, CIBERESP, IMB-Arrixaca, Murcia University); Eva Ardanaz, Marcela Guevara (Navarra Cancer Registry, CIBERESP); Jaume Galceran, Marià Carulla (Tarragona Cancer Registry); Mohsen Mousavi (Basel Cancer Registry); Christine Bouchardy (Geneva Cancer Registry); Silvia M. Ess (Grisons-Glarus, St. Gallen Cancer Registry); Andrea Bordoni (Ticino Cancer Registry); Isabelle Konzelmann (Valais Cancer Registry); Jem Rashbass (Public Health England);

Damien Bennet, Sinead Hawkins (Northern Ireland Cancer Registry); David H Brewster (Scotland Cancer Registry); Dyfed Wyn Huws (Welsh Cancer Intelligence and Surveillance Unit); Otto Visser, Jan Maarten van der Zwan, Sabine Siesling (The Netherlands Cancer Registry); Ellen Benhamou (Institut de Cancérologie Gustave Roussy, Villejuif, France); Renée Otter (Scientific Institute of Public Health, Brussels).
